# Supplementary material for: Regulation of Cell Cycle Regulators by SIRT1 Contributes to Resveratrol-Mediated Prevention of Pulmonary Arterial Hypertension
Source: Biomed Res Int. 2015 Jul 26;2015:762349. doi: 10.1155/2015/762349 (PMC4529917; doi:10.1155/2015/762349)
Supplement: Supplementary file 1 — Expression of CDK2 and CDK4 have no remarkable change in PDGF-BB treated HPASMCs. Overexpression of SIRT1 decreases CDK2 protein level but not affects CDK4 expression. SIRT1 expression level and the effect of resveratrol in MCT-induced PAH rats. Expression of Cyclin E has no remarkable change in lungs of PAH rats. [file 762349.f1.pdf]

## Supporting Information

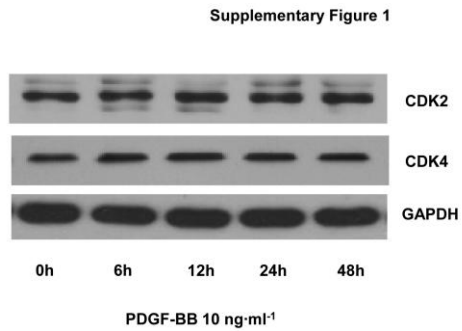

**Figure S1. Expression of CDK2 and CDK4 have no remarkable change in PDGF-BB treated HPASMCs.**

After 24 hours serum starvation, HPASMCs were treated with 10 ng·ml<sup>-1</sup> PDGF-BB and harvested at the indicated time points. CDK2 and CDK4 protein levels were analyzed by western blotting.

Supplementary Figure 2

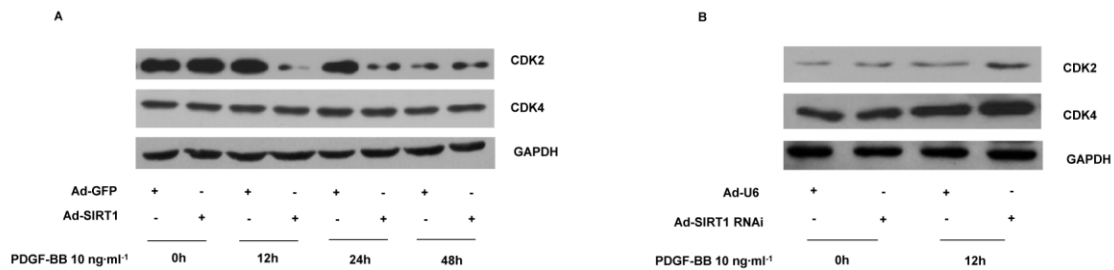

**Figure S2. Overexpression of SIRT1 decreases CDK2 protein level but not affects CDK4 expression.**

HPASMCs infected with Ad-SIRT1(A) or control Ad-GFP, and Ad-SIRT1 RNAi (B) or control Ad-U6 were treated with 10 ng·ml<sup>-1</sup> PDGF-BB for the indicated period. CDK2 and CDK4 protein expression level were analyzed by western blotting.

Supplementary Figure 3

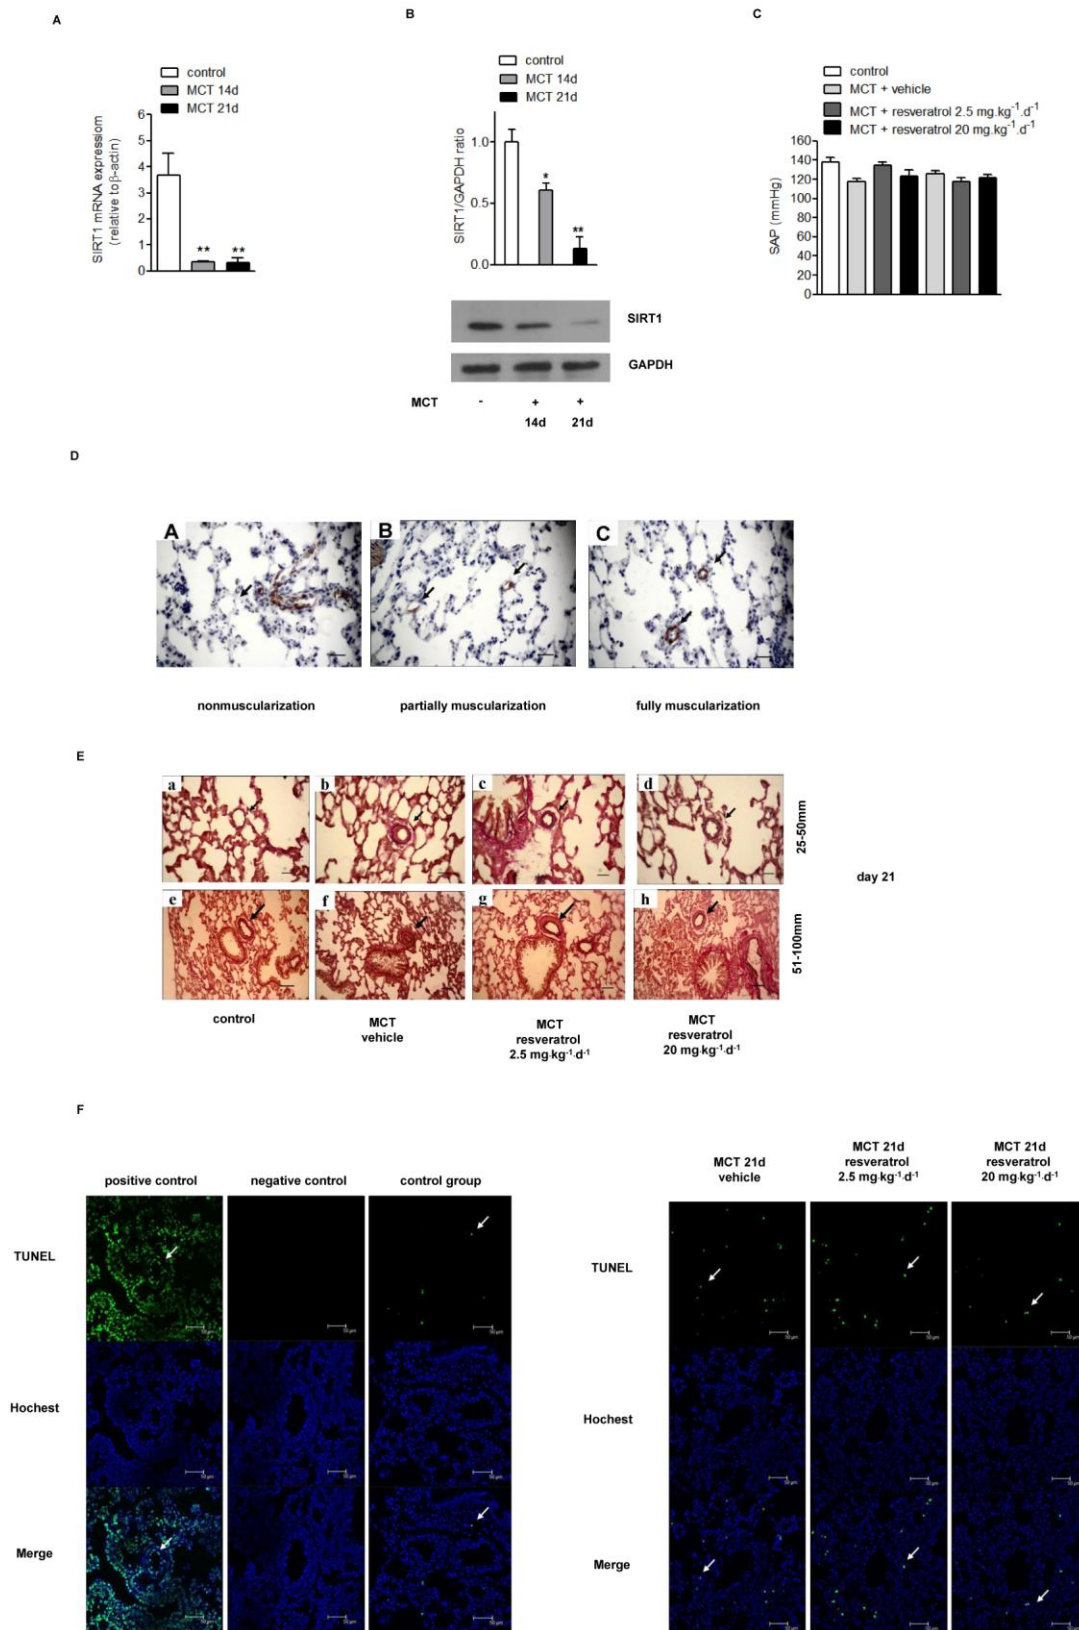

**Figure S3. SIRT1 expression level and the effect of resveratrol in MCT-induced PAH rats.**

(A) SIRT1 mRNA level in lungs of MCT-induced PAH rats was analyzed by real-time PCR (n=3). (B) SIRT1 protein level in lungs of MCT-induced PAH rats was analyzed by western blotting. \* $P < 0.05$ , \*\* $P < 0.01$  versus control. (C) Systemic arterial pressure (SAP; in mmHg) in the different treatment group is shown. Data shown are Mean  $\pm$  SEM (n=8-10). (D) Representative  $\alpha$ -SMA staining photomicrographs of pulmonary vessels. Scale bar=25 $\mu$ m. (E) Representative EVG staining photomicrographs. (F) Effect of resveratrol on PASMCs apoptosis. Representative TUNEL staining photomicrographs of pulmonary vessels from each group. Scale bar=50 $\mu$ m.

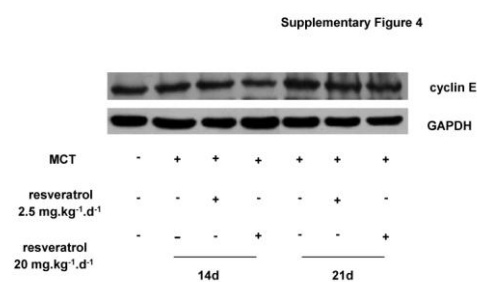

**Figure S4. Expression of Cyclin E has no remarkable change in lungs of PAH rats.**

Cyclin E protein level in lungs of PAH rats was detected by western blotting.
